# Supplementary material
Source: PubMed Central journal article supplement (PMC528795)
Supplement: nar_32_19_5766__1.pdf [file nar_32_19_5766__1.pdf]

**Gene content comparisons between *Acinetobacter ADP1*, *Pseudomonas aeruginosa*, *Pseudomonas putida* and *Pseudomonas syringae* genomes.**

Putative orthologs are defined as genes showing a minimum of 30% identity and a ratio of 0.8 of the length of the smallest protein, or as two genes included in a synteny group. The intersections between the three circles give the number of genes found in the 2 or 3 compared species. Genes outside these areas are specific to the corresponding organism. The total number of annotated genes is also given under each specie name.

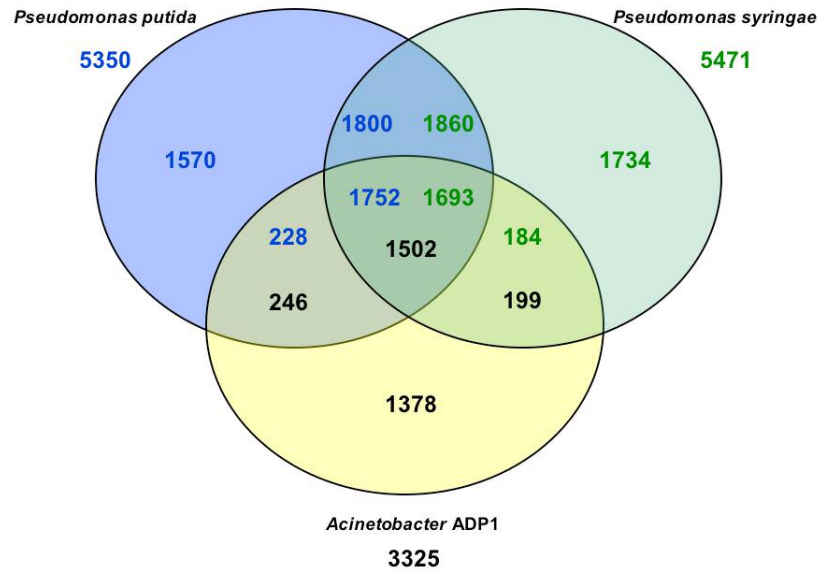

- a. Gene content comparisons between *Acinetobacter ADP1*, *Pseudomonas putida* and *Pseudomonas syringae* genomes.

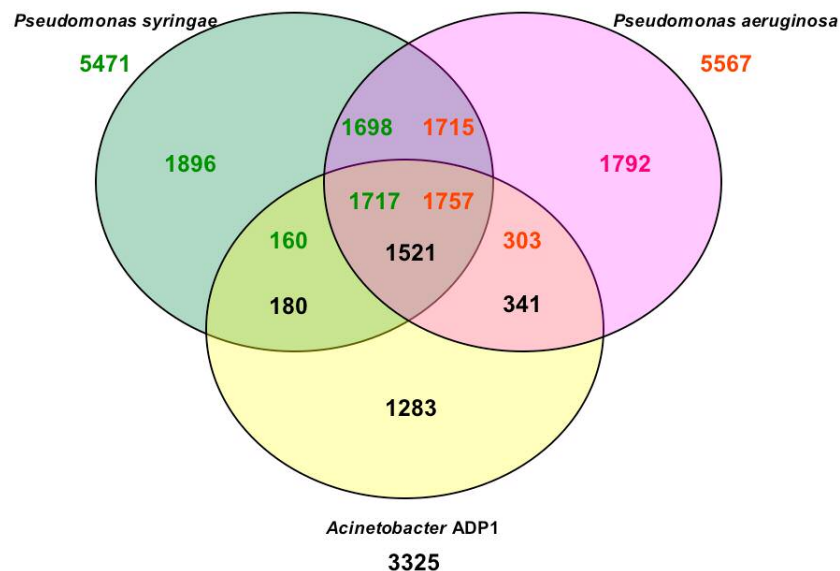

- b. Gene content comparisons between *Acinetobacter ADP1*, *Pseudomonas putida* and *Pseudomonas aeruginosa* genomes.

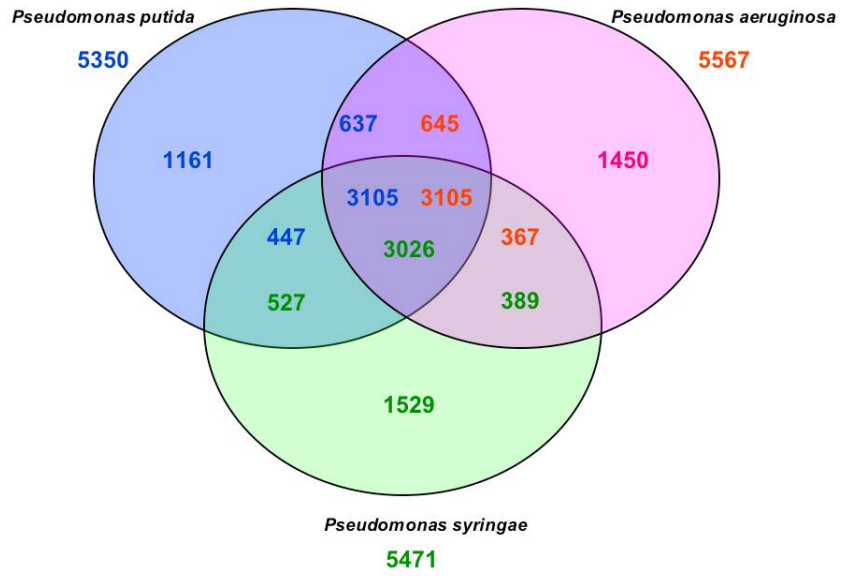

- c. Gene content comparisons between *Pseudomonas aeruginosa*, *Pseudomonas putida* and *Pseudomonas syringae* genomes.
